# Supplementary material for: Mutations in the ilvN gene mitigate growth inhibitory effect of cysteine in Corynebacterium glutamicum
Source: Springer Nature journal article supplement (doi:10.1007/s00253-025-13444-y), 2025-03-10
Supplement: MOESM1 [file 253_2025_13444_MOESM1_ESM.pdf]

## **Supplementary materials**

### **Mutations in the *ilvN* gene mitigate growth inhibitory effect of cysteine in *Corynebacterium glutamicum***

Kazuho Matsuhisa, Katsuhiro Ogawa, Kento Komata, Takashi Hirasawa<sup>\*</sup>

School of Life Science and Technology, Institute of Science Tokyo, 4259 Nagatsuta-cho, Midori-ku, Yokohama, Kanagawa 226-8501, Japan

<sup>\*</sup>Corresponding author

thirasawa@life.isct.ac.jp

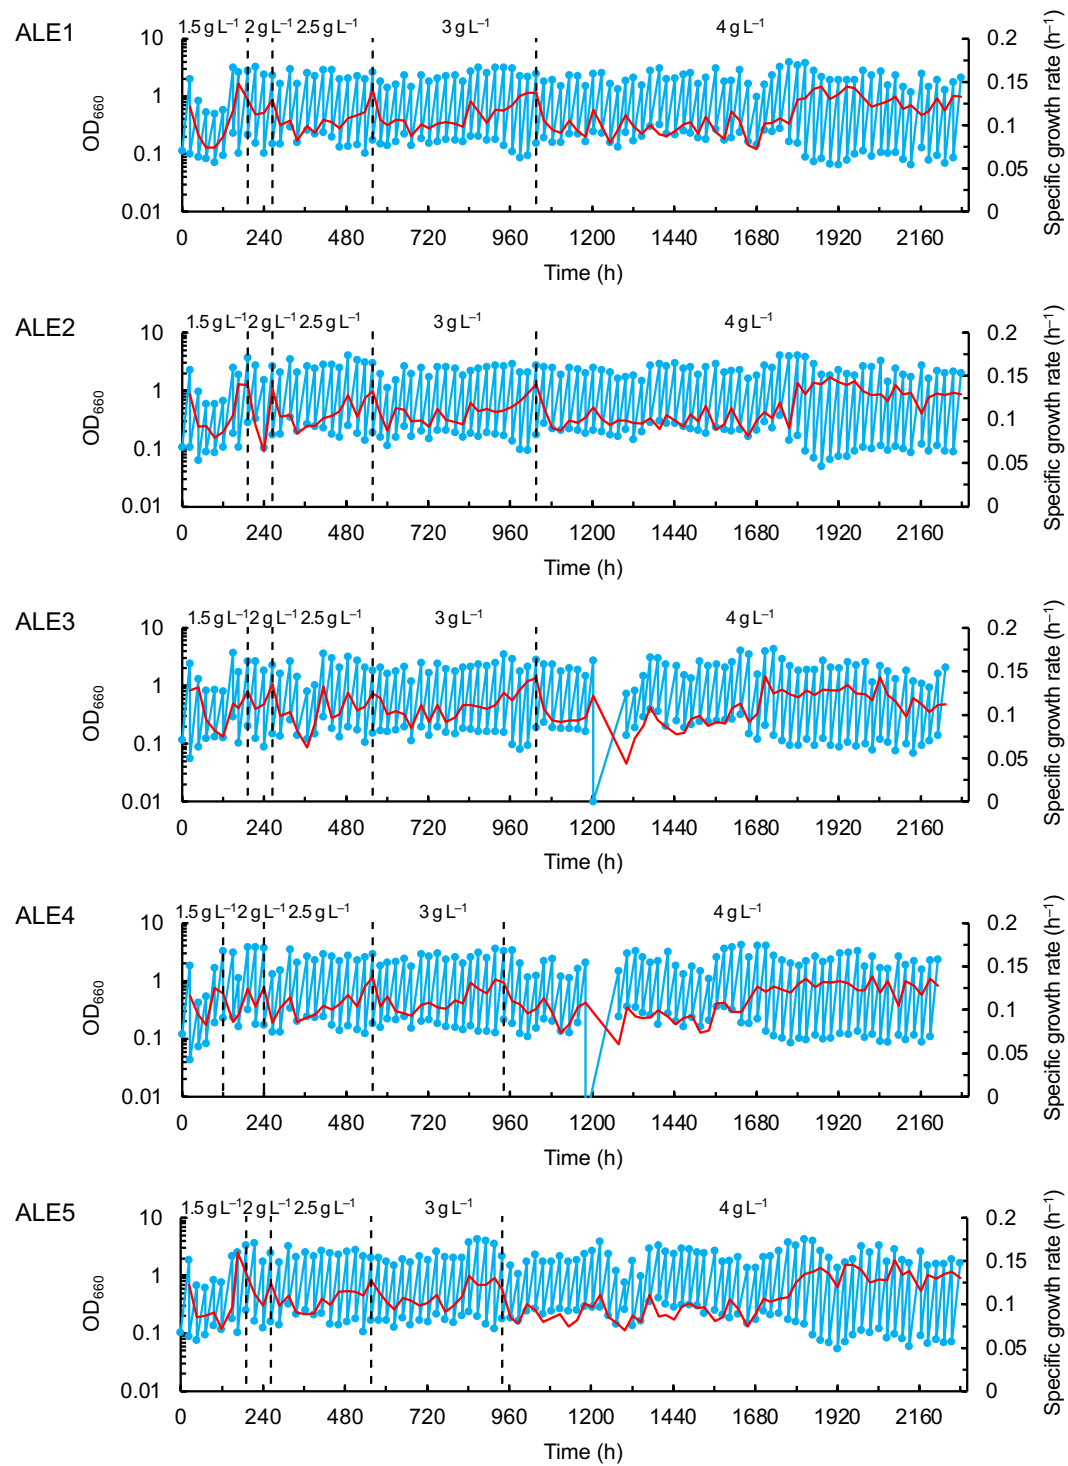

**Supplementary Fig. S1** Adaptive laboratory evolution (ALE) of *C. glutamicum* in the presence of cysteine. Serial transfer of culture to the fresh medium was repeated and the concentration of cysteine hydrochloride monohydrate ( $\text{Cys} \cdot \text{HCl} \cdot \text{H}_2\text{O}$ ) was increased stepwise. Blue circles with solid line and red line represent time courses of cell growth and specific growth rate, respectively. In addition, black dotted lines represent timing of changing the concentration of  $\text{Cys} \cdot \text{HCl} \cdot \text{H}_2\text{O}$  indicated above each graph.

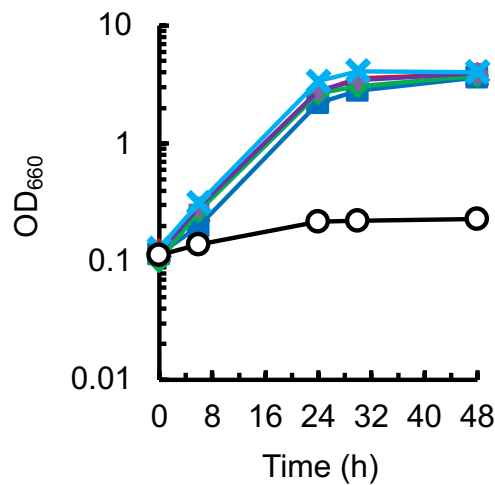

**Supplementary Fig. S2** Growth of cell population obtained at the end of ALE in the presence of cysteine. Frozen cultures prepared at the end of ALE were inoculated to the modified M9 medium containing  $4 \text{ g L}^{-1}$  Cys·HCl·H<sub>2</sub>O and cultured at 30°C for 1 d. For preparing the preculture of the *aecD* disruptant, the modified M9 medium without cysteine addition was used. The preculture was diluted in the modified M9 medium containing the same concentration of Cys·HCl·H<sub>2</sub>O and then cultured at 30°C. Growth of the cells from ALE1 (red triangles), ALE2 (blue squares), ALE3 (green diamonds), ALE4 (purple pluses) and ALE5 (light blue crosses) as well as that of the *aecD* disruptant (black open circles) is shown.

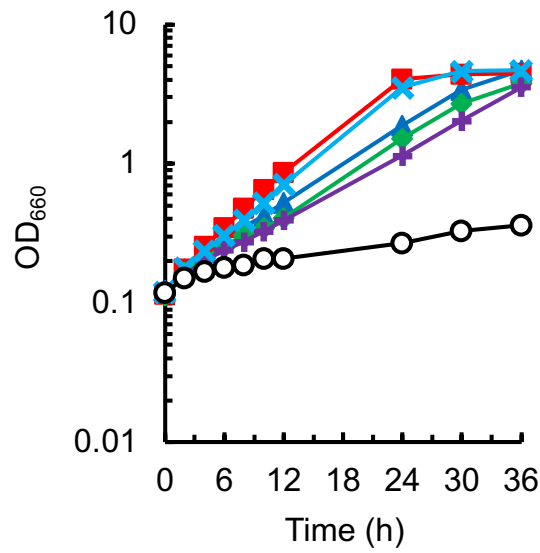

**Supplementary Fig. S3** Stability of cysteine resistance of cell populations obtained by ALE. Frozen cultures prepared at the end of ALE were inoculated to the modified M9 medium and cultured at 30°C for 1 d. The preculture was diluted in the modified M9 medium and then cultured at 30°C. This serial transfer process was repeated five times. After that, the culture was diluted in the modified M9 medium containing 4 g L<sup>-1</sup> Cys·HCl·H<sub>2</sub>O and cultured at 30°C. Growth of the cells from ALE1 (red triangles), ALE2 (blue squares), ALE3 (green diamonds), ALE4 (purple pluses) and ALE5 (light blue crosses) as well as that of the *aecD* disruptant (black open circles) is shown.

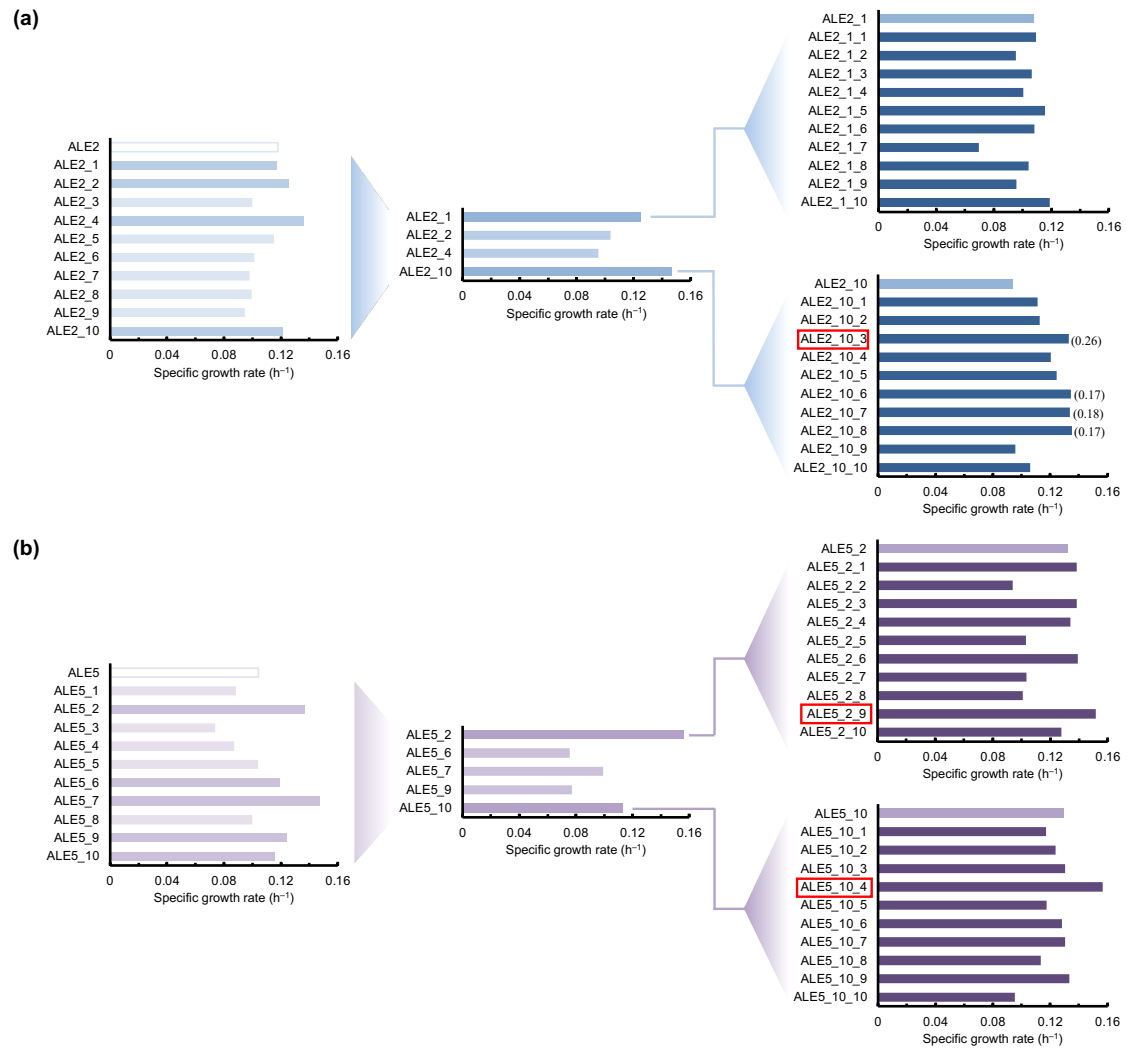

**Supplementary Fig. S4** Isolation of cysteine-resistant mutant strains from cell populations at the end of ALE in ALE2 (a) and ALE5 (b). Values with parentheses for ALE2\_10\_3, ALE2\_10\_6, ALE2\_10\_7 and ALE2\_10\_8 represent the  $\text{OD}_{660}$  at 12 h. Red squares represent the strains chosen as cysteine-resistant mutants.

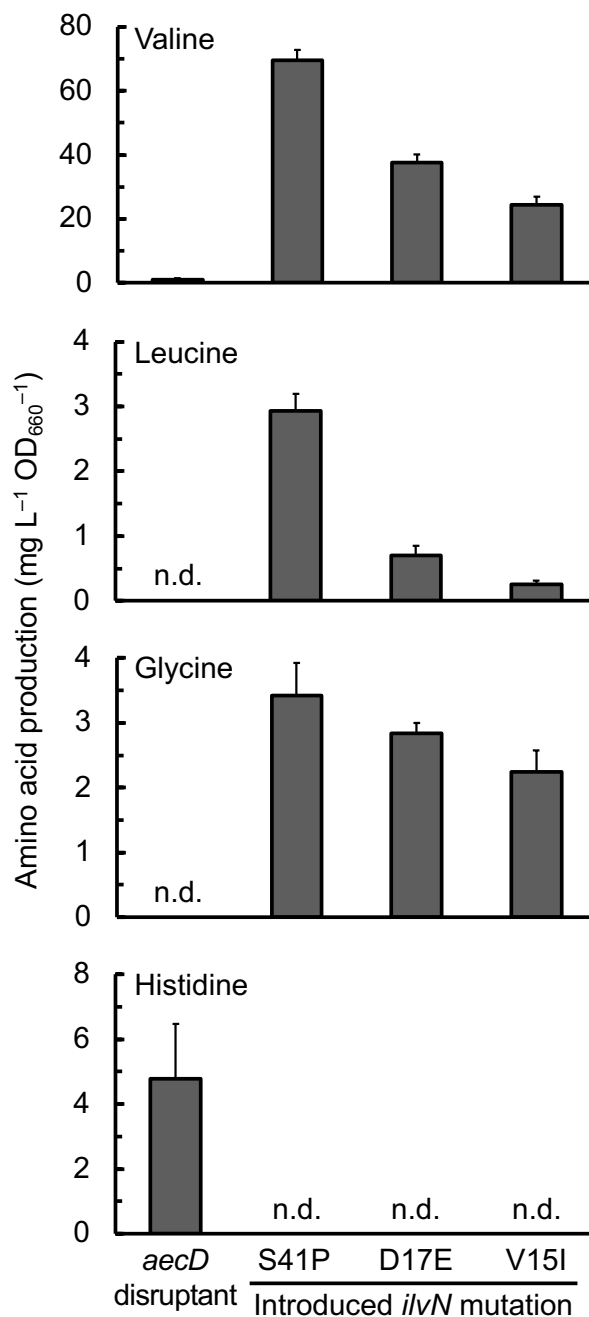

**Supplementary Fig. S5** Effect of *ilvN* mutations on amino acid production in the *aecD* gene disruptant of *C. glutamicum*. The *aecD* gene disruptant and the *ilvN* mutation-carrying *aecD* gene disruptant were cultured in 4 mL of modified M9 medium for 24 h and then their culture supernatant was obtained. Amino acid concentration in the culture supernatant was determined using the precolumn amino acid analysis system. Average  $\pm$  standard deviation in three independent cultures is shown. n.d., not detected.

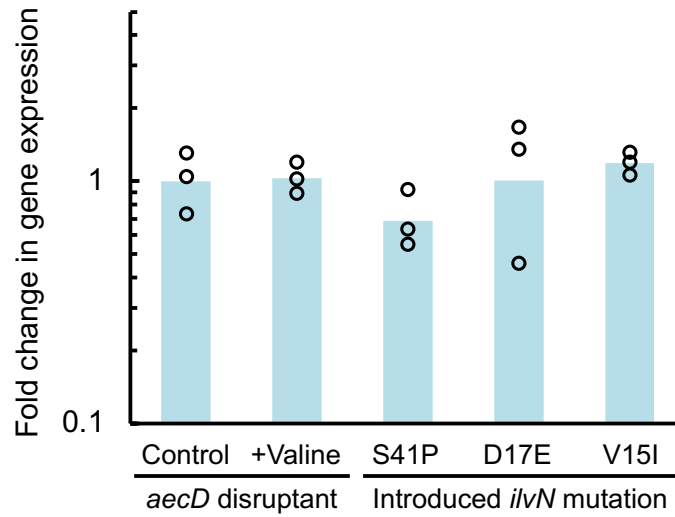

**Supplementary Fig. S6** Effect of valine and *ilvN* mutations on *katA* gene expression in *C. glutamicum*. Geometric mean of fold change in *katA* gene expression by valine addition and introduction of *ilvN* mutation into the *aecD* gene disruptant relative to that in the *aecD* gene disruptant in three independent cultures is shown as bars. Circles represent the fold change in expression in each cell sample from three independent cultures of each strain.

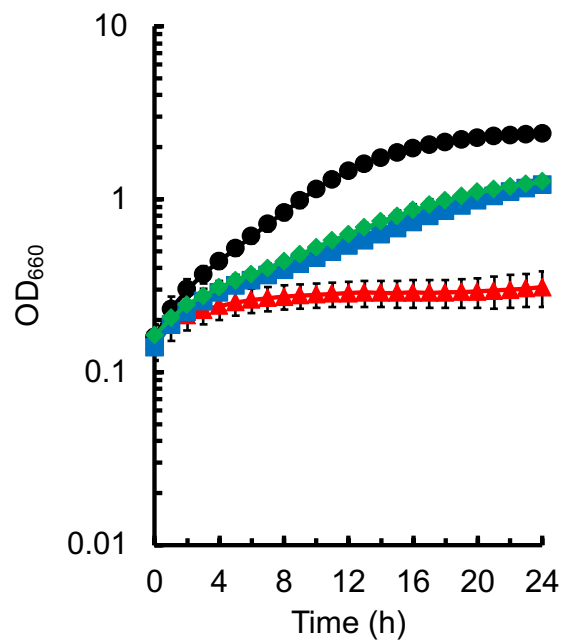

**Supplementary Fig. S7** Effect of *katA* gene disruption on mitigation of growth inhibitory effect of cysteine by valine in *C. glutamicum*. Growth of the *aecD katA* disruptant of *C. glutamicum* without cysteine addition (black circles) and with addition of 0.5 g L<sup>-1</sup> Cys·HCl·H<sub>2</sub>O alone (red triangles) and 0.5 g L<sup>-1</sup> Cys·HCl·H<sub>2</sub>O plus 0.1 g L<sup>-1</sup> (blue squares) or 0.2 g L<sup>-1</sup> (green diamonds) valine is shown. Average ± standard deviation of the data in three independent culture is shown.



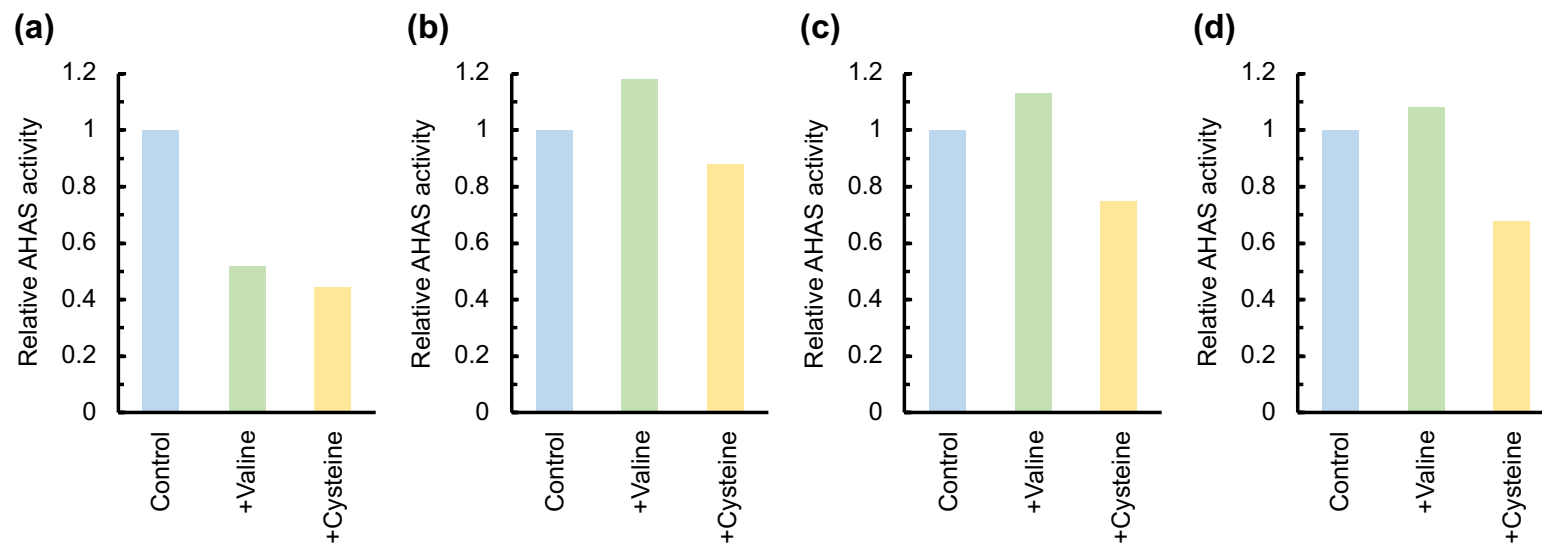

**Supplementary Fig. S8** Effect of *ilvN* mutations on AHAS activity in *C. glutamicum*.

Activity of AHAS from the *aecD* gene disruptant (a) and *ilvN* mutations S41P (b), D17E (b) and V15I-carrying *aecD* gene disruptant in the presence of 1 mM valine (+Valine) and 0.1 g L<sup>-1</sup> Cys·HCl·H<sub>2</sub>O (+Cysteine) relative to that in the absence of them (Control) is shown.

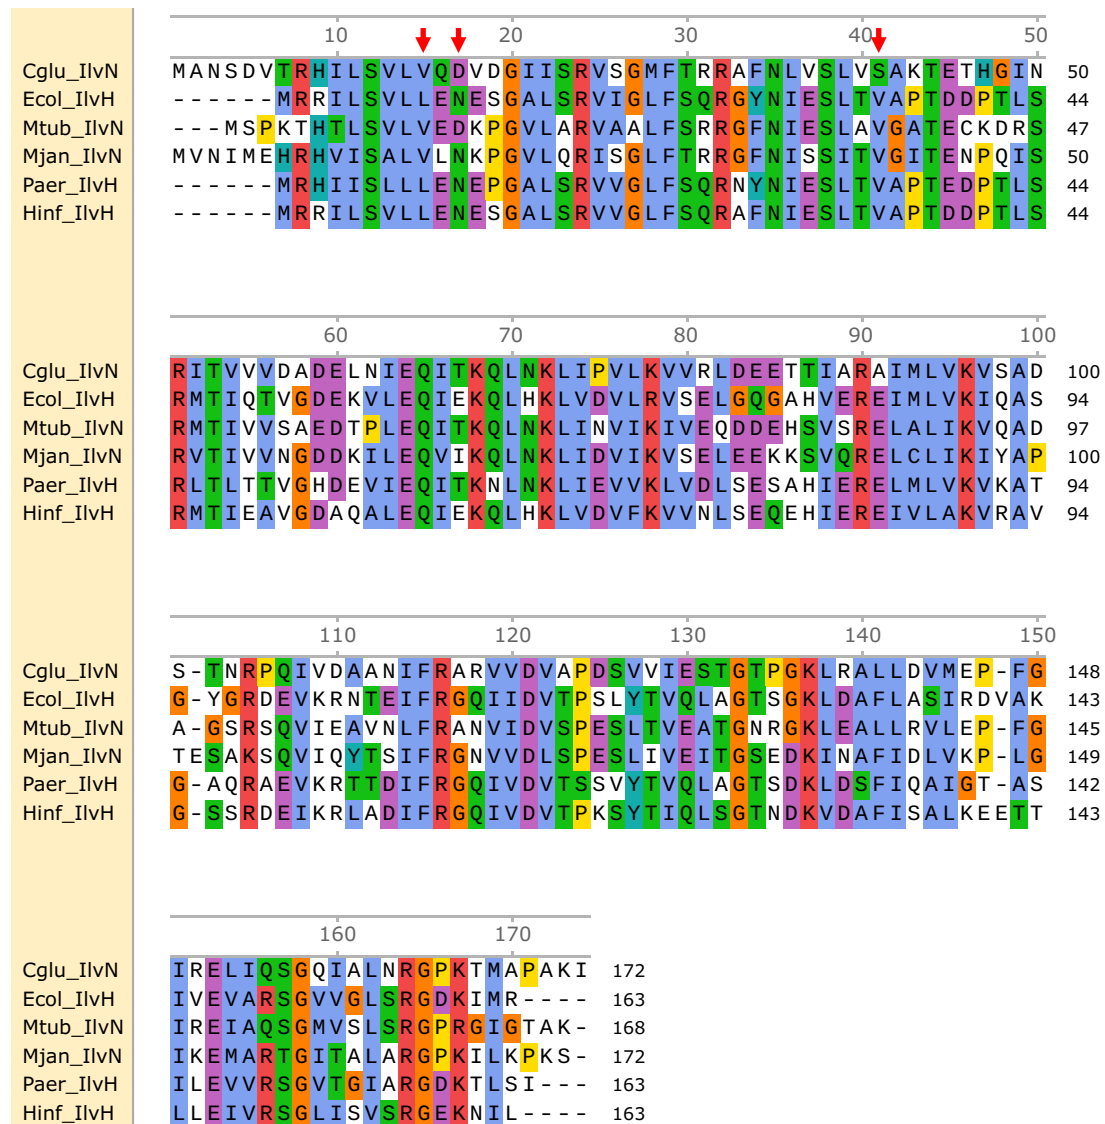

**Supplementary Fig. S9** Multiple alignment of amino acid sequences of acetohydroxyacid synthase regulatory small subunits from *C. glutamicum* (Cglu\_IlvN), *Escherchia coli* (Ecol\_IlvH), *Mycobacterium tuberculosis* (Mtub\_IlvN), *Methanocaldococcus jannaschii* (Mjan\_IlvN), *Pseudomonas aeruginosa* (Paer\_IlvH) and *Haemophilus influenzae* (Hinf\_IlvN). Alignment analysis was performed using CLUSTAL omega (<https://www.ebi.ac.uk/jdispatcher/msa/clustalo>). The analysis data was visualized with SnapGene Viewer (GSL Biotech LLC, San Diego, CA). Coloring of amino acid residues is defined following the default Clustal X coloring scheme (<https://support.snapgene.com/hc/en-us/articles/10527861802516-What-are-the-SnapGene-Protein-Multiple-Alignment-Color-Highlighting-Schemes>). Red arrows represent the amino acid residues where the mutations were found in the cell population in ALE cultures and the cysteine-resistant mutants of *C. glutamicum*.

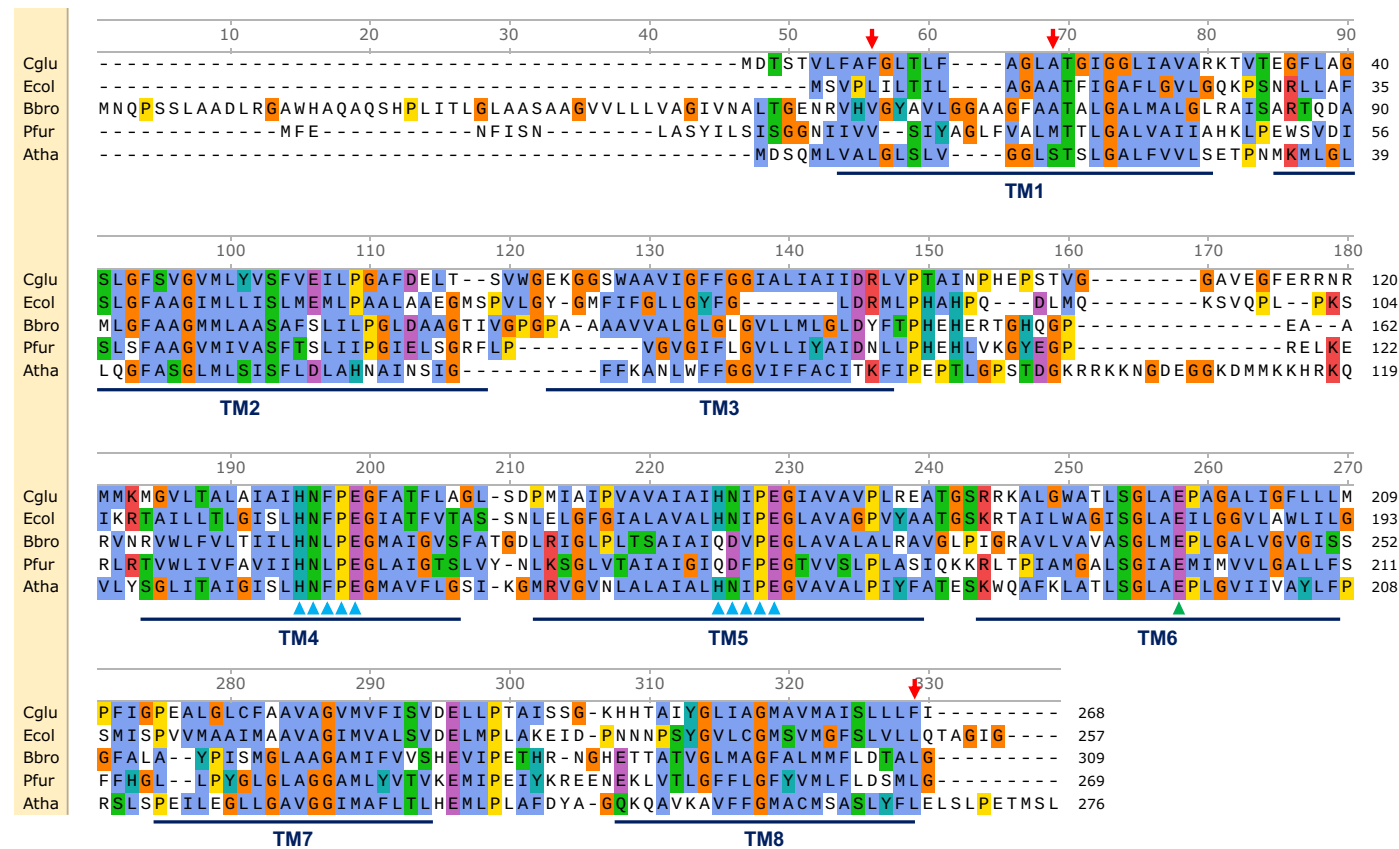

**Supplementary Fig. S10** Multiple alignment of amino acid sequences of ZIP family protein homologs from *C. glutamicum* ZupT (NCgl1379) (Cglu), *E. coli* ZupT (Ecol), *Bordetella bronchiseptica* BB2405 (Bbro), *Pyrococcus furiosus* PF0746 (Pfur) and *Arabidopsis thaliana* AT3G20870 (Atha). Alignment analysis was performed using CLUSTAL omega (<https://www.ebi.ac.uk/jdispatcher/msa/clustalo>). The analysis data was visualized with SnapGene Viewer (GSL Biotech LLC). Coloring of amino acid residues is defined following the default Clustal X coloring scheme (<https://support.snapgene.com/hc/en-us/articles/10527861802516-What-are-the-SnapGene-Protein-Multiple-Alignment-Color-Highlighting-Schemes>). Red arrows represent the amino acid residues where the mutations were found in the cell populations in ALE cultures and the cysteine-resistant mutants of *C. glutamicum*. TM1–TM8 represent eight transmembrane domains of the *B. bronchiseptica* BB2405 determined by its crystal structure (Zhang et al. 2017). Blue and green triangles represent the conserved amino acid residues constituting metal binding domains M1 and M2, respectively.

**Supplementary Table S1** Specific growth rate during exponential growth and final OD<sub>660</sub> value in *C. glutamicum* wild-type NBRC 12168 strain and its *aecD* gene disruptant.

| Strain                      | Cys·HCl·H <sub>2</sub> O concentration (g L <sup>-1</sup> ) | Specific growth rate during exponential growth (h <sup>-1</sup> ) <sup>a</sup> | Final OD <sub>660</sub> value <sup>b</sup> |
|-----------------------------|-------------------------------------------------------------|--------------------------------------------------------------------------------|--------------------------------------------|
| NBRC 12168                  | No addition                                                 | 0.23 ± 0.02                                                                    | 3.03 ± 0.15                                |
|                             | 0.25                                                        | 0.21 ± 0.02                                                                    | 1.73 ± 0.18                                |
|                             | 0.5                                                         | 0.16 ± 0.02                                                                    | 1.56 ± 0.03                                |
|                             | 1                                                           | 0.10 ± 0.01                                                                    | 1.69 ± 0.26                                |
| <i>aecD</i> gene disruptant | No addition                                                 | 0.15 ± 0.01                                                                    | 3.07 ± 0.19                                |
|                             | 0.25                                                        | 0.033 ± 0.007                                                                  | 0.22 ± 0.04                                |
|                             | 0.5                                                         | 0.023 ± 0.002                                                                  | 0.22 ± 0.03                                |
|                             | 1                                                           | 0.017 ± 0.006                                                                  | 0.23 ± 0.03                                |

This table was made based on the data in Fig. 1. Average ± standard deviation in three independent culture experiment is shown.

<sup>a</sup>Specific growth rates of the NBRC 12168 strain during exponential growth were calculated using OD<sub>660</sub> values at 2–8 h. In addition, specific growth rates of the *aecD* gene disruptant were calculated using OD<sub>660</sub> values at 2–8 h in the absence and presence of 0.25 g L<sup>-1</sup> Cys·HCl·H<sub>2</sub>O and at 3–6 h in the presence of 0.5 and 1 g L<sup>-1</sup> Cys·HCl·H<sub>2</sub>O.

<sup>b</sup>The OD<sub>660</sub> value at 24 h is shown.

**Supplementary Table S2** Summary of genome resequencing analysis of the cell populations in ALE cultures and isolated cysteine-resistant mutants.

| Sample                                                  | Number of mutations detected | Number of mutations found in ORF | Number of missense mutations in ORF | Number of mutations found in intergenic region between ORFs |
|---------------------------------------------------------|------------------------------|----------------------------------|-------------------------------------|-------------------------------------------------------------|
| <i>aecD</i> disruptant                                  | 24                           | 15                               | 10                                  | 9                                                           |
| Cell population from ALE2 at 1655.8 h (248 generations) | 33                           | 21                               | 13                                  | 12                                                          |
| Cell population from ALE2 at 2279 h (362 generations)   | 39                           | 26                               | 18                                  | 13                                                          |
| ALE2_10_3 strain                                        | 41                           | 28                               | 18                                  | 13                                                          |
| Cell population from ALE5 1680.5 h (240 generations)    | 34                           | 21                               | 12                                  | 13                                                          |
| Cell population from ALE5 at 2279 h (352 generations)   | 78                           | 56                               | 37                                  | 22                                                          |
| ALE5_2_9 strain                                         | 103                          | 80                               | 54                                  | 23                                                          |
| ALE5_10_4 strain                                        | 101                          | 71                               | 48                                  | 30                                                          |

Mutations include single nucleotide variants, insertions and deletions.

**Supplementary Table S3** Mutations found in the *zupT* gene in the cell populations of ALE and cysteine-resistant mutants

| Cell population of ALE or cysteine-resistant strain     | Mutation found in <i>zupT</i> locus |          |                                       |
|---------------------------------------------------------|-------------------------------------|----------|---------------------------------------|
|                                                         | Position on the genome              | Mutation | Corresponding amino acid substitution |
| Cell population from ALE2 at 1655.8 h (248 generations) | 1512228                             | G→T      | Ala19→Ser                             |
| Cell population from ALE2 at 2279 h (362 generations)   | 1512228                             | G→T      | Ala19→Ser                             |
| ALE2_10_3 strain                                        | 1512228                             | G→T      | Ala19→Ser                             |
| Cell population from ALE5 1680.5 h (240 generations)    | 1512973                             | T→A      | Phe267→Tyr                            |
| Cell population from ALE5 at 2279 h (352 generations)   | 1512196                             | T→C      | Phe8→Ser                              |
|                                                         | 1512973                             | T→A      | Phe267→Tyr                            |
| ALE5_2_9 strain                                         | 1512196                             | T→C      | Phe8→Ser                              |
| ALE5_10_4 strain                                        | 1512196                             | T→C      | Phe8→Ser                              |

**Supplementary Table S4** Mutations found not in the cell population from ALE2 at 1655.8 h but in the cell population from ALE2 at 2279 h and the ALE2\_10\_3 strain

| Position on the genome | Gene ID  | Annotation                                                         | Mutation | Corresponding amino acid substitution | Cell population from ALE2 at 1655.8 h | Cell population from ALE2 at 2279 h | ALE2_10_3 strain |
|------------------------|----------|--------------------------------------------------------------------|----------|---------------------------------------|---------------------------------------|-------------------------------------|------------------|
| 860356                 | NCglr05  | 23S ribosomal RNA                                                  | G→T      | None                                  | –                                     | +                                   | +                |
| 860357                 | NCglr05  | 23S ribosomal RNA                                                  | T→C      | None                                  | –                                     | +                                   | +                |
| 998518                 | NCgl0906 | Putative UDP-N-acetylglucosamine pyrophosphorylase ( <i>glmU</i> ) | C→A      | Lys464→Asn                            | –                                     | –                                   | +                |
| 1421742                | NCgl1304 | Ribosomal protein S1 ( <i>rpsA</i> )                               | C→T      | Ser215→Phe                            | –                                     | +                                   | +                |
| 2416683                | NCgl2203 | Undecaprenyl pyrophosphate synthase                                | C→T      | Val140→Met                            | –                                     | +                                   | +                |
| 2577288                | NCgl2350 | ABC-type transporter, duplicated ATPase component                  | A→C      | Leu529→Pro                            | –                                     | +                                   | –                |

“+” and “–” represent presence and absence of the mutation, respectively.

**Supplementary Table S5** Mutations found not in the cell population from ALE5 at 1680.5 h but in the cell population from ALE5 at 2279 h and the ALE5\_2\_9 and ALE5\_10\_4 strains

| Position on the genome | Gene ID  | Annotation                                                                                                                       | Mutation | Corresponding amino acid substitution | Cell population from ALE5 at 1680.5 h | Cell population from ALE5 at 2279 h | ALE5_2_9 strain | ALE5_10_4 strain |
|------------------------|----------|----------------------------------------------------------------------------------------------------------------------------------|----------|---------------------------------------|---------------------------------------|-------------------------------------|-----------------|------------------|
| 38544                  | NCgl0037 | ABC-type transporter, ATPase component                                                                                           | G→A      | Glu115→Lys                            | –                                     | –                                   | –               | +                |
| 45498                  | NCgl0043 | Bacterial cell division membrane protein ( <i>rodA</i> )                                                                         | G→A      | Ser391→Leu                            | –                                     | –                                   | +               | –                |
| 72221                  | NCgl0068 | Two-component system, response regulators consisting of a CheY-like receiver domain and a HTH DNA-binding domain ( <i>citB</i> ) | G→T      | Ala21→Ser                             | –                                     | +                                   | –               | –                |
| 87772                  | NCgl0079 | Predicted acetyltransferases and hydrolases with the alpha/beta hydrolase fold                                                   | G→A      | Thr254→Ile                            | –                                     | –                                   | –               | +                |
| 92046                  | NCgl0085 | Urea amidohydrolase (urease) alpha subunit ( <i>ureC</i> )                                                                       | G→A      | Gly19→Ser                             | –                                     | –                                   | +               | –                |
| 137680                 | NCgl0124 | Hypothetical protein                                                                                                             | C→T      | Pro226→Ser                            | –                                     | –                                   | –               | +                |
| 180667                 | NCgl0164 | Hypothetical protein                                                                                                             | G→A      | Ala327→Thr                            | –                                     | –                                   | +               | –                |
| 231097                 | NCgl0213 | ABC-type transporter, ATPase component                                                                                           | C→T      | Arg249→Gln                            | –                                     | –                                   | –               | +                |
| 251422                 | NCgl0232 | ABC-type multidrug/protein/lipid transport system, ATPase component                                                              | C→T      | Thr296→Ile                            | –                                     | –                                   | +               | –                |
| 257353                 | NCgl0237 | Aspartate transaminase ( <i>aspB</i> )                                                                                           | G→A      | Gly246→Asp                            | –                                     | –                                   | +               | –                |
| 355628                 | NCgl0331 | Hypothetical protein                                                                                                             | C→T      | Arg70→His                             | –                                     | –                                   | –               | +                |
| 439786                 | NCgl0402 | Glutamyl-tRNA reductase ( <i>hemA</i> )                                                                                          | G→A      | Gly425→Asp                            | –                                     | +                                   | +               | +                |
| 458335                 | NCgl0419 | Cation transport ATPase                                                                                                          | C→T      | His357→Tyr                            | –                                     | –                                   | –               | +                |
| 464216                 | NCgl0423 | Phosphoglycerate mutase/fructose-2,6-bisphosphatase                                                                              | G→A      | Ser117→Asn                            | –                                     | +                                   | –               | –                |
| 473264                 | NCgl0434 | Hypothetical protein                                                                                                             | C→T      | Pro106→Leu                            | –                                     | +                                   | –               | –                |
| 486631                 | NCgl0449 | O-succinylbenzoate synthase and related enzyme ( <i>menC</i> )                                                                   | G→A      | Ala211→Thr                            | –                                     | –                                   | +               | –                |
| 599502                 | NCgl0560 | Hypothetical protein                                                                                                             | C→T      | Pro437→Ser                            | –                                     | –                                   | +               | –                |
| 604729                 | NCgl0566 | Predicted hydrolases or acyltransferases (alpha/beta hydrolase superfamily)                                                      | G→A      | Gly101→Asp                            | –                                     | –                                   | +               | –                |
| 686811                 | NCgl0641 | Exonuclease III                                                                                                                  | G→A      | Gly126→Asp                            | –                                     | +                                   | +               | +                |
| 697230                 | NCgl0651 | Hypothetical protein                                                                                                             | C→T      | Gly256→Arg                            | –                                     | +                                   | +               | +                |
| 714230                 | NCgl0664 | Uncharacterized protein involved in propionate catabolism ( <i>prpDI</i> )                                                       | T→C      | Leu498→Ser                            | –                                     | –                                   | –               | +                |



|         |          |                                                                                                                                    |     |             |   |   |   |   |
|---------|----------|------------------------------------------------------------------------------------------------------------------------------------|-----|-------------|---|---|---|---|
| 733207  | NCgl0682 | K <sup>+</sup> transporter                                                                                                         | C→T | His50→Tyr   | – | – | + | – |
| 747114  | NCgl0698 | ABC-type transporter, ATPase component                                                                                             | G→A | Pro305→Ser  | – | – | + | – |
| 803310  | NCgl0732 | Hypothetical protein                                                                                                               | C→T | Val311→Ile  | – | – | + | – |
| 861593  | NCgl0780 | PLP-dependent aminotransferases                                                                                                    | T→C | Met1→Thr    | – | + | + | + |
| 955953  | NCgl0865 | FAD/FMN-containing dehydrogenase ( <i>dld</i> )                                                                                    | G→C | Asp482→Glu  | – | + | + | + |
| 962812  | NCgl0871 | Mg-dependent DNase                                                                                                                 | T→C | Ser2→Pro    | – | + | – | – |
| 979668  | NCgl0887 | Predicted drug exporter of the RND superfamily                                                                                     | A→G | Leu358→Pro  | – | – | – | + |
| 990568  | NCgl0896 | ABC-type transporter, ATPase component ( <i>urtD</i> )                                                                             | C→T | His197→Ser  | – | + | + | + |
| 1020899 | NCgl0924 | Transcription-repair coupling factor - superfamily II helicase ( <i>mfd</i> )                                                      | G→A | Ala609→Thr  | – | – | – | + |
| 1028408 | NCgl0927 | Hypothetical protein                                                                                                               | C→T | Gly170→Asp  | – | + | + | + |
| 1029082 | NCgl0928 | Hypothetical protein                                                                                                               | C→T | Gly401→Glu  | – | – | – | + |
| 1082149 | NCgl0986 | Na <sup>+</sup> -dependent transporters of the SNF family                                                                          | C→T | Trp171→Stop | – | – | + | – |
| 1089590 | NCgl0993 | Transposase [ <i>tnp9a</i> (ISCg9a)]                                                                                               | C→T | Asp51→Asn   | – | + | + | + |
| 1117612 | NCgl1023 | Nicotinate-nucleotide pyrophosphorylase ( <i>nadC</i> )                                                                            | C→T | Val45→Met   | – | – | + | – |
| 1167327 | NCgl1077 | Hypothetical protein                                                                                                               | G→A | Ser73→Asn   | – | + | + | + |
| 1181509 | NCgl1087 | Shikimate 5-dehydrogenase ( <i>aroE2</i> )                                                                                         | C→T | Arg56→His   | – | – | + | – |
| 1186962 | NCgl1092 | Permease of the major facilitator superfamily                                                                                      | G→A | Gly380→Ser  | – | – | + | – |
| 1219460 | NCgl1116 | Na <sup>+</sup> /proline, Na <sup>+</sup> /panthothenate symporters and related permease ( <i>putP</i> )                           | G→A | Ala48→Val   | – | – | – | + |
| 1226713 | NCgl1120 | ATPase involved in DNA repair                                                                                                      | G→A | Asp550→Asn  | – | + | + | + |
| 1273508 | NCgl1160 | F <sub>0</sub> F <sub>1</sub> -type ATP synthase c subunit/Archaeal/vacuolar-type H <sup>+</sup> -ATPase subunit K ( <i>atpE</i> ) | G→A | Val75→Ile   | – | + | + | + |
| 1501791 | NCgl1369 | Rhodanese-related sulfurtransferase ( <i>sseA2</i> )                                                                               | G→A | Val28→Ile   | – | – | – | + |
| 1712282 | NCgl1552 | Predicted nucleoside-diphosphate sugar epimerases (SulA family)                                                                    | T→C | Val16→Ala   | – | – | – | + |
| 1811615 | NCgl1647 | Hypothetical protein                                                                                                               | T→C | Ser18→Pro   | – | – | + | – |
| 1837545 | NCgl1669 | Predicted ATPase ( <i>priP</i> )                                                                                                   | G→A | Asp332→Asn  | – | + | + | + |
| 1882838 | NCgl1706 | Hypothetical protein                                                                                                               | A→G | Ser385→Pro  | – | – | – | + |
| 1888935 | NCgl1711 | Hypothetical protein                                                                                                               | G→A | Arg54→Cys   | – | – | + | – |
| 2034004 | NCgl1852 | HrpA-like helicase ( <i>hrpA</i> )                                                                                                 | G→A | Glu843→Lys  | – | + | + | + |
| 2053042 | NCgl1869 | tRNA delta(2)-isopentenylpyrophosphate transferase ( <i>miaA</i> )                                                                 | G→A | Ala182→Val  | – | – | + | – |
| 2136947 | NCgl1946 | CDP-diglyceride synthetase ( <i>cdsA</i> )                                                                                         | G→A | Ala48→Val   | – | – | – | + |
| 2177275 | NCgl1985 | Hypothetical protein                                                                                                               | C→T | Trp736→Stop | – | – | + | – |

|         |          |                                                                           |     |              |   |   |   |   |
|---------|----------|---------------------------------------------------------------------------|-----|--------------|---|---|---|---|
| 2296613 | NCgl2088 | Hypothetical protein                                                      | A→G | Leu96→Pro    | – | + | – | – |
| 2311268 | NCgl2100 | Hypothetical protein                                                      | A→G | Asp484→Gly   | – | – | + | – |
| 2502226 | NCgl2277 | Aldo/keto reductases, related to diketogulonate reductase ( <i>dkgA</i> ) | G→A | Pro118→Leu   | – | + | + | + |
| 2517323 | NCgl2293 | Valyl-tRNA synthetase ( <i>valS</i> )                                     | G→A | Arg342→Cys   | – | – | + | – |
| 2613900 | NCgl2381 | Hypothetical protein                                                      | C→T | Pro8→Leu     | – | – | – | + |
| 2855938 | CNgl2591 | Hypothetical protein                                                      | G→A | Gly48→Asp    | – | – | – | + |
| 2860538 | NCgl2594 | Lysyl-tRNA synthetase class II ( <i>lysS</i> )                            | C→T | Val516→Ile   | – | – | + | – |
| 2933583 | NCgl2655 | Serine/threonine protein kinase ( <i>pknG</i> )                           | C→T | His407→Tyr   | – | – | + | – |
| 2987482 | NCgl2703 | Predicted permease                                                        | G→A | Asp249→Asn   | – | – | + | – |
| 3034378 | NCgl2749 | Hypothetical protein                                                      | C→T | Thr66→Met    | – | + | + | + |
| 3089092 | NCgl2789 | Hypothetical protein                                                      | C→T | Ala168→Val   | – | – | – | + |
| 3114589 | NCgl2811 | Hypothetical protein                                                      | C→T | Arg324→Cys   | – | – | + | – |
| 3188112 | NCgl2884 | Membrane carboxypeptidase (penicillin-binding protein) ( <i>mrcB</i> )    | G→A | Ala364→Val   | – | + | + | + |
| 3222198 | NCgl2915 | Leucyl-tRNA synthetase ( <i>leuS</i> )                                    | G→A | Ser146→Phe   | – | – | – | + |
| 3231945 | NCgl2924 | Na <sup>+</sup> /H <sup>+</sup> -dicarboxylate symporter                  | G→A | Gln116→Stop  | – | + | – | – |
| 3256941 | NCgl2951 | Protocatechuate 3,4-dioxygenase beta subunit ( <i>catA3</i> )             | A→G | Val145→Ala   | – | + | – | – |
| 3263652 | NCgl2956 | Hypothetical protein                                                      | G→A | Glu139→Lys   | – | – | – | + |
| 3270585 | NCgl2959 | Hypothetical protein                                                      | C→T | Gln1328→Stop | – | – | – | + |

“+” and “–” represent presence and absence of the mutation, respectively.

**Reference**

Zhang T, Liu J, Fellner M, Zhang C, Sui D, Hu J (2017) Crystal structures of a ZIP zinc transporter reveal a binuclear metal center in the transport pathway. *Sci Adv* 3:e1700344. doi:10.1126/sciadv.1700344
